# Supplementary material for: Noise in gene expression is coupled to growth rate
Source: HighWire-hosted journal article supplement (doi:10.1101/gr.191635.115), 2015-09-09
Supplement: Supplemental_Data_processed_legend.docx [file Supplemental_Data_processed_legend.docx]

**Noise in gene expression is coupled to growth rate – Additional supplemental material**

The following supplemental material was added to the manuscript on February 4, 2016, and is in addition to the data previously provided in the file Supplemental Data.txt (which includes the unprocessed data [before gating and filtering]).

1. Supplemental Data Processed – includes the processed data (after time filtering, gating and uniting replicates). A full description of the data analysis pipeline is detailed in the methods section.
